RESEARCH ARTICLE

# The immediate effects of a single autogenic drainage session on ventilatory mechanics in adult subjects with cystic fibrosis

Elliot Wallaert<sup>1</sup>, Thierry Perez<sup>2</sup>, Anne Prevotat<sup>2</sup>, Gregory Reychler<sup>3</sup>, Benoit Wallaert<sup>2\*</sup>, Olivier Le Rouzic<sup>2</sup>

**1** Faculté des Sciences de la Motricité, Université Catholique de Louvain, Louvain-la-Neuve, Belgium, **2** CHU-Lille, Centre de Ressource et de Compétence pour la Mucoviscidose, Service de Pneumologie et Immuno-allergologie, Hôpital Calmette and Univ. Lille, Lille, France, **3** Service de Médecine Physique et Réadaptation, Cliniques Universitaires Saint-Luc and Institut de Recherche Expérimentale et Clinique (IREC), Pôle de Pneumologie, ORL et Dermatologie, Université Catholique de Louvain, Brussels, Belgium

\* [benoit.wallaert@chru-lille.fr](mailto:benoit.wallaert@chru-lille.fr)

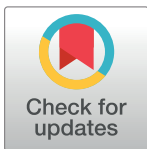

## Abstract

### OPEN ACCESS

**Citation:** Wallaert E, Perez T, Prevotat A, Reychler G, Wallaert B, Le Rouzic O (2018) The immediate effects of a single autogenic drainage session on ventilatory mechanics in adult subjects with cystic fibrosis. *PLoS ONE* 13(3): e0195154. <https://doi.org/10.1371/journal.pone.0195154>

**Editor:** Brenda M. Morrow, University of Cape Town, SOUTH AFRICA

**Received:** August 25, 2017

**Accepted:** February 28, 2018

**Published:** March 29, 2018

**Copyright:** © 2018 Wallaert et al. This is an open access article distributed under the terms of the [Creative Commons Attribution License](https://creativecommons.org/licenses/by/4.0/), which permits unrestricted use, distribution, and reproduction in any medium, provided the original author and source are credited.

**Data Availability Statement:** All relevant data are within the paper and its Supporting Information files.

**Funding:** "Acting for a healthier population, The Hauts-de-France" funded this work (2015-063). All authors disclose any financial and personal relationships with other people or organizations that could inappropriately influence this work.

**Competing interests:** The authors have declared that no competing interests exist.

## Introduction

The aim of this study was to gain insight into the physiological changes occurring in subjects with cystic fibrosis (CF) after autogenic drainage (AD). Changes in respiratory system resistance (Rrs), reactance (Xrs), and spirometry were analyzed in adult CF subjects after a single AD physiotherapy session.

## Methods

This prospective observational study was conducted during the annual check-up of adult CF subjects in stable condition. Spirometry and Rrs and Xrs measurements using the forced oscillations technique at 5, 11, and 19 hertz (Hz) were performed before and 30 min after a 20-min AD session. Control CF subjects were tested at baseline and 50 min without AD. Results are expressed as mean ± standard deviation or median [interquartile range].

## Results

Thirty subjects were included in the physiotherapy group (age 29 [25–34] years, forced expiratory volume in 1 s (FEV<sub>1</sub>) 40.3 [30.1–57.9]% predicted) and 11 in the control group (age 31 [28.5–36.5] years, FEV<sub>1</sub> 43.6 [31.1–51.9] % predicted). No significant changes in any parameter were observed in the control group. AD modestly but significantly increased the forced vital capacity (FVC) and FEV<sub>1</sub> (p<0.001). Inspiratory resistance was also significantly improved by AD: Rrs<sub>5</sub> from 5.74±2.39 to 5.24±2.17 cmH<sub>2</sub>O/L/s, p<0.05; Rrs<sub>11</sub> from 4.83±1.98 to 4.32±1.7 cmH<sub>2</sub>O/L/s, p = 0.003; and Rrs<sub>19</sub> from 4.18 [3.46–5.07] to 3.86 [2.76–4.98] cmH<sub>2</sub>O/L/s, p<0.001. In contrast, AD had no significant effects on frequency dependence of resistance (Rrs<sub>5</sub>–Rrs<sub>19</sub>) or expiratory resistance. Inspiratory Xrs<sub>5</sub>, but not ΔXrs<sub>5</sub> (expiratory—inspiratory Xrs), was improved by AD (p<0.05). Moderate correlations were

detected between the improvement in FEV<sub>1</sub> and FVC and inspiratory resistance ( $r = 0.53$ ,  $p = 0.005$  and  $r = 0.44$ ,  $p = 0.02$ , respectively).

## Conclusion

A single session of AD improved inspiratory airway resistance, except in the distal airways. The forced oscillations technique provides a new tool for understanding the pathophysiological effects of airway clearance physiotherapy in CF.

## Introduction

Cystic fibrosis (CF) is the most common genetic disease in the Caucasian population. Cause of death is linked to respiratory disease due to the accumulation of mucus in the airways, which ultimately leads to secondary infections, bronchiectasis, and respiratory failure [1].

Physiotherapy is an integral part of the treatment of CF [2] and the clinical efficacy of airway clearance is well established [3][4][5][6]. According to a recent Cochrane systematic review, no single airway clearance technique has shown superiority [7]. However, patients usually express a strong preference for self-administered airway clearance techniques, such as autogenic drainage (AD) or the active cycle of breathing technique, rather than postural drainage and percussion [3][6]. There is an urgent need to gain insight into the nature and underlying mechanisms of the physiological changes occurring in CF subjects after physiotherapy [8]. The forced oscillations technique (FOT), developed in the 1950s by DuBois [9], allows analysis of ventilatory mechanics, resistance (Rrs), and reactance (Xrs), both globally and at different levels of the respiratory tract during tidal breathing [10]. A previous study of FOT showed that adult CF subjects had higher resistance and reactance values compared with the healthy population, suggesting that the FOT might provide sensitive indicators of respiratory system resistive and reactance properties in CF subjects [11]. Recently, Guimaraes et al. showed improvements in resistance and conductance in CF subjects, as measured by plethysmography, following respiratory physiotherapy by slow and complete expiration in the lateral posture with opened glottis (ELTGOL) or Flutter interventions [12].

Since the FOT has been shown to provide relevant information on respiratory mechanics, the primary aim of this study was to gain insight into the physiological changes occurring in CF subjects after physiotherapy with AD, rather than to demonstrate clinical efficacy of AD *per se*. To this end, we assessed the impact of a single AD session on Rrs and Xrs via FOT measurements in stable CF subjects.

## Materials and methods

### Subjects

Consecutive adult subjects with CF followed at the Cystic Fibrosis Center (Centre de Ressource et de Compétence pour la Mucoviscidose) in Lille were enrolled during their annual check-ups. The diagnosis of CF was based on the presence of (1) a sweat chloride concentration  $>60$  mmol/L and/or genetic confirmation of two CF-associated mutations and (2) two clinical features consistent with CF [13]. All subjects were clinically stable (no antibiotics for an exacerbation in the preceding 4 weeks). Patients who had received lung transplants or had confirmed asthma were excluded from the study. The study protocol was approved by the appropriate ethics committee (N° 17/068, Lyon). All individuals gave written informed

consent. Approval for the use of these data was provided by the Institutional Review Board of the French Learned Society for Pulmonology (CEPRO 2015–004).

### Study design

All tests were performed in a single visit. The subjects did not perform physical therapy on the morning of the tests and received no bronchodilator or mucolytic treatment in the 12 h preceding the tests. For the physiotherapy group, FOT and spirometry were performed before the 20-min AD session (baseline) and after a 30-min rest period following completion of the AD session. The tests were performed in the same order at both time points. To avoid a possible effect of the first spirometry forced expiratory maneuvers on the second FOT measurements, a non-randomized control group of 11 CF subjects underwent two sets of tests (the same tests in the same order) 50 min apart, but did not receive physiotherapy.

### Autogenic drainage

AD is an airway clearance technique developed by Dab [14] and Chevallier [15]. The technique is based on non-forced expiration during controlled breathing at different levels of vital capacity. While sitting, the patient first performs diaphragmatic breathing at low lung volume following a cycle of (i) slow inspiration through the nose, (ii) pause for 3 s, (iii) non-forced exhalation in a sighing manner through the nose or mouth, and (iv) repetition of steps (i) to (iii) at the same lung volume until mucus movement can be felt. The entire breathing cycle is repeated at progressively increasing lung volumes, so that mucus is moved from the small to the mid-sized to the large airways. Finally, the mucus is evacuated from the trachea by huffing [16]. In this study, the cycles were repeated for a total AD session of ~20 min.

### Forced oscillations technique

FOT was performed with a Resmon Pro FULL (Restech; Milan, Italy) in multifrequency mode at 5, 11, and 19 hertz (Hz). The subjects used a nose clip and mouthpiece that stabilized the tongue position as they effortlessly breathed in their tidal volume. The test was done with the patient in a sitting position and the cheeks firmly supported to reduce airway shunting. Before each subject was tested, machine calibration was checked using the calibration test object provided by the manufacturer. The test was performed in accordance with the European Respiratory Society Task Force recommendations on forced oscillation testing, and acceptability was confirmed on-site in accordance with the criteria proposed by the task force [17]. We measured whole-breath and partitioned (inspiratory and expiratory) values for resistance at 5, 11, and 19 Hz ( $R_{rs5}$ ,  $R_{rs11}$ , and  $R_{rs19}$ , respectively) and for reactance at 5 Hz ( $X_{rs5}$ ) [18]. The difference between inspiratory  $R_{rs5}$  and  $R_{rs19}$  was considered representative of the small airway contribution, and  $\Delta X_{rs5}$  ( $X_{rs}$  expiratory— $X_{rs}$  inspiratory) was considered an index of expiratory flow limitation (EFL) using a cut-off value of 1 cm H<sub>2</sub>O [18]. Three valid measurements were taken, and the mean of the three measurements are reported. Results are expressed as absolute values (cmH<sub>2</sub>O/L/s) [19].

### Spirometry

Spirometry was performed using the MICRO spirometer 5000 (Medisoft; Sorinnes, Belgium). Forced vital capacity (FVC), forced expiratory volume in 1 s ( $FEV_1$ ),  $FEV_1/FVC$ , and forced expiratory flow between 25 and 75% of the FVC ( $FEF_{25-75}$ ) were measured. Baseline spirometry results are expressed as z-scores, in accordance with the recent multiethnic Global Lung Function Initiative spirometry equations [20]. By analogy with COPD and in the absence of

specific data for CF, a threshold improvement of 100 mL FEV<sub>1</sub> was considered clinically significant [21].

## Sputum

All sputum produced during each 20-min AD session and for 30 min after was collected in a sterile, pre-weighed container (balance precision 1.0 mg). After weighing, the wet secretions were heated in an oven at 60°C for 72 h and then re-weighed to obtain the dry weight.

## Statistical analysis

Statistical analysis was performed with R software (version 3.4.2). The Shapiro—Wilks *W* test was used to determine whether the data were normally distributed. Quantitative continuous variables are presented as the median and interquartile range (25<sup>th</sup>–75<sup>th</sup> percentile) or mean ± standard deviation, and categorical variables as the number and percentage. Student's *t*-test was used to analyze normally distributed. Wilcoxon test and Kuskal-wallis to analyze non-normal data. Pearson's *r* test was used to determine correlations between the quantitative parameters. The power calculation for this study was based on data published for CF patients [12]. Using a two-sided alpha of 0.05 and a reduction of ≥0.5 cmH<sub>2</sub>O/L/s for Rrs<sub>5</sub> as statistically significant, a minimum of 36 subjects was required to provide a power of 0.8. *P*<0.05 was considered statistically significant.

## Results

Thirty-six subjects were enrolled in the physiotherapy study, of whom six were excluded due to an inability to obtain valid breathing cycles during FOT testing. A final total of 30 CF subjects in the physiotherapy group (14 women and 16 men) and 11 CF subjects in the control group (7 women and 4 men) were included. Their characteristics are summarized in Table 1.

The spirometry, Rrs, and Xrs results are presented in Table 2. All subjects exhibited moderate to severe obstructive ventilatory disorder characterized by reduced FEV<sub>1</sub> and FEV<sub>1</sub>/FVC, increased bronchial resistance, and decreased reactance (Table 1). There were no significant differences between the two groups when comparing baseline values. The control group showed no significant changes in any parameters between the baseline and second evaluation (Table 2).

The physiotherapy group patients underwent an AD session lasting an average of 20 min. The mean sputum wet and dry weights produced between the first and second measures (obtained in 27/30 subjects) were 11.235 g ± 7.53 and 0.687 g ± 0.56, respectively. After AD, there were modest but significant improvements in FVC and FEV<sub>1</sub> (both *p*<0.001; Table 2). FEV<sub>1</sub> was improved by at least 100 mL in 7 patients (23.3%) in the physiotherapy group and 2 (18.1%) in the control group (not significant). No change was observed in FEF<sub>25–75</sub> after AD. We observed a similar magnitude of improvement in inspiratory Rrs<sub>5</sub>, Rrs<sub>11</sub>, and Rrs<sub>19</sub> after AD. Total (whole-breath) resistance at 11 and 19 Hz were also significantly decreased after AD. The change in inspiratory Rrs<sub>11</sub> and Rrs<sub>19</sub> in the AD group was statistically significant when compared with the control group (*p*<0.05). Inspiratory Rrs<sub>5</sub> decreased by at least 0.5 cmH<sub>2</sub>O/L/s in 13 subjects in the AD group (Fig 1) and 1 subject in the control group (*p* = 0.06). There was no significant change in Rrs<sub>5</sub>–Rrs<sub>19</sub> after AD. The improvements in inspiratory resistance were not significantly different at 5, 11, and 19 Hz. AD had no significant effect on expiratory resistance. Inspiratory Xrs<sub>5</sub> was improved after AD (*p*<0.05); however, no other significant changes in Xrs were observed.

ΔXrs<sub>5</sub> at baseline was high (>1 cmH<sub>2</sub>O/L/s), consistent with a significant EFL in 10 patients (33.3%) in the physiotherapy group and 4 (36%) in the control group (not significant), but this was not improved by AD. There were no correlations between the sputum (wet or dry) weight

**Table 1. Characteristics of the cystic fibrosis patients.**

| Variable                        |                   | CF controls<br>(N = 11) | Physiotherapy group<br>(N = 30) |
|---------------------------------|-------------------|-------------------------|---------------------------------|
| Age                             | years             | 31.0 [28.5–36.5]        | 29.0 [25.0–34.0]                |
| Weight                          | kg                | 54.0 [49.0–59.0]        | 52.5 [49.2–60.5]                |
| Height                          | cm                | 161.2 ± 9.5             | 165.4 ± 9.0                     |
| BMI                             | kg/m <sup>2</sup> | 20.6 [19.7–22.9]        | 19.9 [18.6–21.0]                |
| FEV <sub>1</sub>                | mL                | 1310 [965–1760]         | 1350 [1068–2143]                |
|                                 | % predicted       | 43.6 [31.1–51.9]        | 40.3 [30.1–57.9]                |
|                                 | z-score           | -4.37 [-4.90 - -3.69]   | -4.71 [-5.39 - -3.28]           |
| FVC                             | mL                | 1980 [1610–2870]        | 2420 [2030–3813]                |
|                                 | % predicted       | 61.7 [52.6–68.3]        | 62.8 [48.1–79.9]                |
|                                 | z-score           | -2.90 [-3.31 - -2.53]   | -3.20 [-4.42 - -1.56]           |
| FEV <sub>1</sub> /FVC           | %                 | 59.4 [49.6–67.1]        | 54.2 [50.7–63.2]                |
|                                 | % predicted       | 70.5 [58.0–78.7]        | 65.2 [59.9–77.1]                |
|                                 | z-score           | -3.03 [-3.72 - -2.40]   | -3.51 [-3.76 - -2.67]           |
| FEF <sub>25–75</sub>            | mL/s              | 610 [410–880]           | 545 [447–1115]                  |
|                                 | % predicted       | 20.1 [12.9–27.3]        | 15.4 [11.0–27.6]                |
|                                 | z-score           | -4.43 [-4.92 - -3.35]   | -4.63 [-5.28 - -3.52]           |
| Homozygous ΔF508                |                   | 6 (55%)                 | 15 (50%)                        |
| Heterozygous ΔF508              |                   | 5 (45%)                 | 8 (26.7%)                       |
| Other mutation                  |                   | 0 (0%)                  | 7 (23.3%)                       |
| <i>Pseudomonas</i> colonization |                   | 9 (82%)                 | 25 (83.3%)                      |
| Other colonization              |                   | 1 (16.7%)               | 5 (16.7%)                       |
| EPI                             |                   | 11 (100%)               | 28 (93.3%)                      |
| Diabetes                        |                   | 2 (18%)                 | 8 (26.7%)                       |

Results are expressed as median [interquartile range] or mean ± SD according to the Shapiro—Wilk test results for quantitative data, or as number (%) for frequencies. No significant differences were detected between the two groups for any parameter. BMI, body mass index; EPI, exocrine pancreatic insufficiency; FVC, forced vital capacity; FEV, forced expiratory volume in one second; FEF<sub>25–75</sub>, 25–75% forced expiratory flow.

<https://doi.org/10.1371/journal.pone.0195154.t001>

and the change in any functional parameter measured. Moderate to good correlations were observed between the change in inspiratory resistance and improvement of both FEV<sub>1</sub> (r = 0.53, p = 0.005) and FVC (r = 0.44, p = 0.02).

## Discussion

Our study is the first to measure the effects of AD airway clearance on respiratory mechanics in CF subjects using FOT. The results show: (1) a moderate decrease in inspiratory resistance in the global (Rrs<sub>5</sub>) and proximal (Rrs<sub>11</sub> and Rrs<sub>19</sub>) airways, but not in the distal compartment (Rrs<sub>5</sub>–Rrs<sub>19</sub>); (2) a statistically (but not clinically) significant improvement in FEV<sub>1</sub> and FVC but not in FEF<sub>25–75</sub>; and (3) a correlation between improved resistance and the improvement in FVC and FEV<sub>1</sub>.

The baseline resistance and reactance values were elevated in the CF subjects, these results are similar to those reported by Lima et al. in adult CF subjects [11]. To our knowledge, there has been only one study to date examining the effects of a chest physiotherapy session (Flutter vs ELTGOL) on airway resistance in CF subjects that demonstrated a significant improvement in plethysmographic resistance [12]. Our results are in agreement with those post-ELTGOL values. However, plethysmography is not able to distinguish between the distal or proximal origin of measured resistance. Our results using FOT showed decreased inspiratory Rrs<sub>5</sub>,

**Table 2. Changes in pulmonary function tests and resistance measures in the physiotherapy and control groups.**

| Variable                                        | CF controls (N = 11)     |                          |                       | Physiotherapy group (N = 30) |                            |                         |
|-------------------------------------------------|--------------------------|--------------------------|-----------------------|------------------------------|----------------------------|-------------------------|
|                                                 | Baseline                 | Second value             | Δ                     | Baseline                     | After AD                   | Δ                       |
| FVC (mL)                                        | 1980<br>[1610–2870]      | 2050<br>[1725–2760]      | 50<br>[-10–105]       | 2420 [2030–3813]             | 2445 ***<br>[2195–4043]    | 115#<br>[67–200]        |
| FEV <sub>1</sub> (mL)                           | 1310<br>[965–1760]       | 1250<br>[955–1735]       | 10<br>[-25–50]        | 1350 [1068–2143]             | 1320 ***<br>[1108–2175]    | 45<br>[37.5–95]         |
| FEV <sub>1</sub> /FVC (%)                       | 59.4<br>[49.6–67.1]      | 59.0<br>[49.7–65.6]      | -0.4<br>[-1.0–0.3]    | 54.2 [50.7–63.2]             | 53.7<br>[50.6–62.4]        | 0.28<br>[-1.3–0.7]      |
| FEF <sub>25–75</sub> (mL/s)                     | 610<br>[410–880]         | 660<br>[380–885]         | 0<br>[-15–105]        | 540<br>[450–985]             | 545 [447–1115]             | 10<br>[-17.5–30]        |
| Rrs <sub>5</sub> inspiratory                    | 5.14 ± 1.93              | 5.19 ± 2.04              | 0.05 ± 0.59           | 5.74 ± 2.39                  | 5.24 ± 2.17 *              | -0.5 ± 1.13             |
| Rrs <sub>5</sub> expiratory                     | 5.90 ± 2.07              | 5.98 ± 2.38              | 0.07 ± 0.50           | 6.66 ± 2.80                  | 6.40 ± 2.85                | -0.27 ± 1.30            |
| Rrs <sub>5</sub> whole-breath                   | 5.58 ± 1.91              | 5.66 ± 2.14              | 0.08 ± 0.51           | 6.29 ± 2.58                  | 5.94 ± 2.54 *              | -0.35 ± 1.08            |
| Rrs <sub>11</sub> inspiratory                   | 4.42 ± 1.41              | 4.54 ± 1.52              | 0.12 ± 0.38           | 4.83 ± 1.98                  | 4.32 ± 1.70 **             | -0.51 ± 0.87 #          |
| Rrs <sub>11</sub> expiratory                    | 5.14<br>[3.98–5.58]      | 5.13<br>[3.99–5.80]      | 0.16<br>[-0.19–0.35]  | 5.28<br>[3.84–6.45]          | 4.77<br>[3.57–7.19]        | -0.14<br>[-0.85–0.35]   |
| Rrs <sub>11</sub> whole-breath                  | 4.73 ± 1.45              | 4.9 ± 1.66               | 0.17 ± 0.51           | 5.33 ± 2.19                  | 4.99 ± 1.98 *              | -0.35 ± 0.86            |
| Rrs <sub>19</sub> inspiratory                   | 3.52<br>[2.76–4.27]      | 3.45<br>[3.03–4.25]      | -0.07<br>[-0.18–0.26] | 4.18<br>[3.46–5.07]          | 3.86 ***<br>[2.76–4.98]    | -0.42 #<br>[-1 - -0.01] |
| Rrs <sub>19</sub> expiratory                    | 3.88<br>[3.23–4.55]      | 3.95<br>[3.44–4.61]      | -0.07<br>[-0.30–0.26] | 4.48<br>[3.54–5.58]          | 4.17<br>[3.31–6.28]        | -0.14<br>[-0.58–0.24]   |
| Rrs <sub>19</sub> whole-breath                  | 4.02<br>[2.98–4.23]      | 3.90<br>[3.33–3.98]      | -0.07<br>[-0.28–0.24] | 4.43<br>[3.49–5.34]          | 4.02 *<br>[3.14–5.70]      | -0.27<br>[-0.69–0.11]   |
| Rrs <sub>5</sub> –Rrs <sub>19</sub> inspiratory | 1.47<br>[0.51–2.19]      | 0.86<br>[0.32–2.12]      | -0.2<br>[-0.34–0.31]  | 0.77<br>[0.34–2.1]           | 1.00<br>[0.43–2.17]        | -0.05<br>[-0.58–0.33]   |
| Xrs <sub>5</sub> inspiratory                    | -2.64<br>[-2.91 - -1.73] | -2.50<br>[-3.08 - -1.23] | 0.31<br>[-0.38–0.61]  | -1.86<br>[-3.47 - -0.94]     | -1.77 *<br>[-3.06 - -0.92] | 0.14<br>[-0.09–0.49]    |
| Xrs <sub>5</sub> expiratory                     | -2.80<br>[-4.70 - -1.94] | -2.93<br>[-5.33 - -1.83] | 0.03<br>[-0.87–0.05]  | -2.87<br>[-4.08 - -1.45]     | -2.70<br>[-4.18 - -1.15]   | 0.06<br>[-0.18–0.33]    |
| Xrs <sub>5</sub> whole-breath                   | -2.65<br>[-3.92 - -1.83] | -2.79<br>[-4.40 - -1.50] | -0.12<br>[-0.73–0.27] | -2.61<br>[-3.84 - -1.18]     | -2.23<br>[-3.72 - -1.11]   | 0.06<br>[-0.10–0.32]    |
| ΔXrs                                            | 0.68<br>[-0.27–1.91]     | 0.76<br>[0.31–2.30]      | 0.41<br>[0.32–0.81]   | 0.46<br>[-0.01–1.68]         | 0.82<br>[0.23–1.50]        | 0.07<br>[-0.29–0.61]    |

Tests were performed at baseline and after 50 min for the control group or at baseline and after 20 min AD + 30 min rest (50 min total) for the physiotherapy group. Resistance and reactance are expressed as cmH<sub>2</sub>O/L/s. Δ, mean ± SD or median [interquartile range] for the change between second value and baseline. FVC, forced vital capacity; FEV<sub>1</sub>, forced expiratory volume in one second; FEF<sub>25–75</sub>, 25–75% forced expiratory flow; Rrs<sub>5</sub>, Rrs<sub>11</sub>, and Rrs<sub>19</sub>, respiratory system resistance at 5, 11, and 19 Hz, respectively; Rrs<sub>5</sub>–Rrs<sub>19</sub>, difference between resistance at 5 and 19 Hz; Xrs, respiratory system reactance at 5 Hz; ΔXrs, Xrs expiratory—Xrs inspiratory.

Comparison with baseline values:

\*p<0.05;

\*\*p = 0.003;

\*\*\*p<0.001.

Comparison with control group:

#p<0.05.

<https://doi.org/10.1371/journal.pone.0195154.t002>

Rrs<sub>11</sub>, and Rrs<sub>19</sub>, but not Rrs<sub>5</sub>–Rrs<sub>19</sub>. According to Brashier and Salvi, Rrs<sub>5</sub>, Rrs<sub>19</sub>, and Rrs<sub>5</sub>–Rrs<sub>19</sub> represent resistance of the global airways, the large airways, and the small airways, respectively [22]. The lack of improvement in Rrs<sub>5</sub>–Rrs<sub>19</sub> observed in our study is consistent with the lack of change in FEF<sub>25–75</sub>. Taken together, these results suggest that AD does not significantly increase the luminal caliber of the distal airways, at least after a single session. This may be because of the timing of measurements. We could argue that the sputum coming from the proximal part of the lung is significantly cleared immediately after the physiotherapy



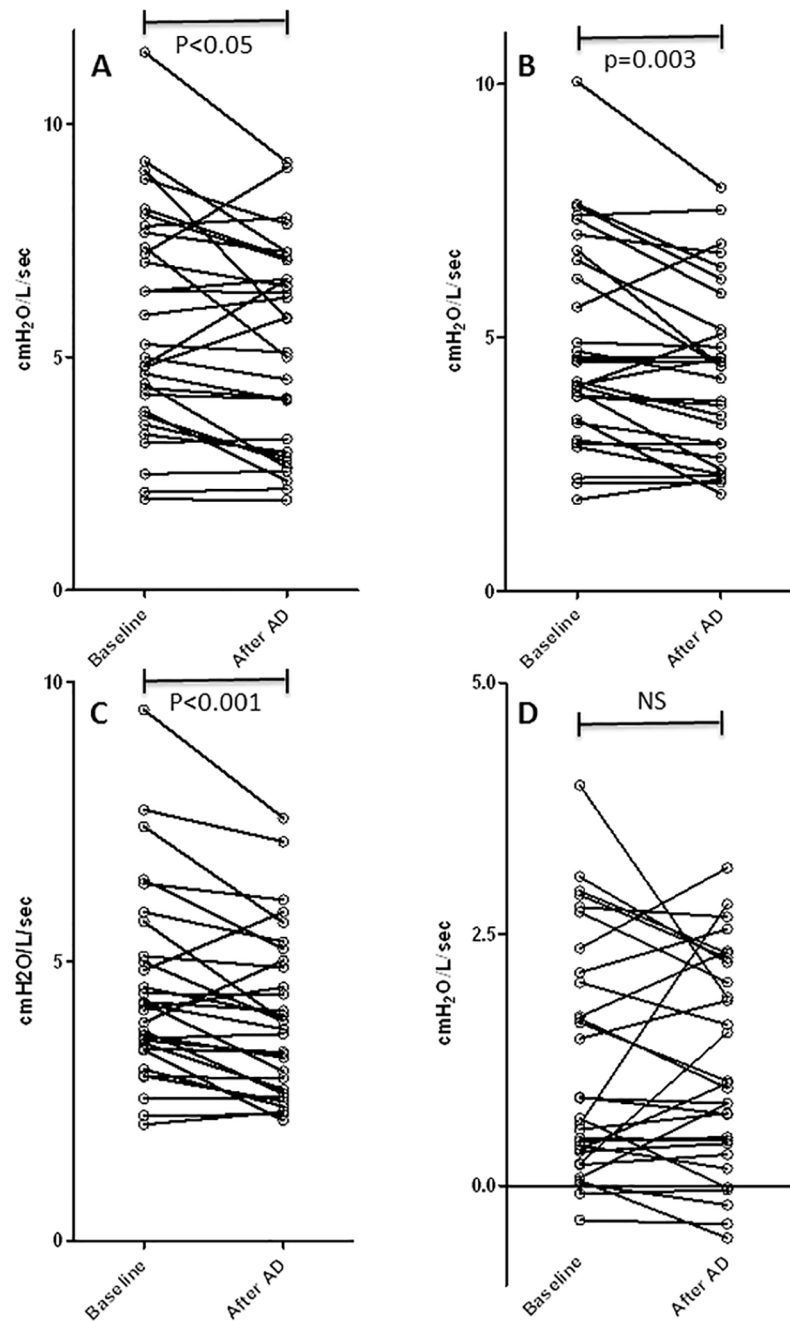

**Fig 1. Individual values of inspiratory resistances before and after autogenic drainage in 30 CF patients. A,  $R_{rs5}$ , B,  $R_{rs11}$ ; C,  $R_{rs19}$ , D,  $R_{rs5}-R_{rs19}$ .**

<https://doi.org/10.1371/journal.pone.0195154.g001>

session, in contrast to the more peripheral secretions. In addition, we cannot exclude the possibility that AD might induce a slight post-exercise bronchoconstriction. The speed of the air-flow in distal airways, and thus the ability to move secretions, is low; therefore, it could take longer to expel mucus from the respiratory tract, or AD may simply not be effective on this portion of the bronchial tree. An improvement in  $R_{rs5}-R_{rs19}$  may not be detectable within 30 min after AD and merits further investigation. In our subjects, global expiratory resistance did

not significantly decrease after AD. The reason for this is not clear, but reflex adduction of the glottis during expiration could interfere with the measurement of expiratory resistance [23] [24]. Alternatively, marked airway instability during expiration in CF patients could compromise the reproducibility of FOT measurements in the expiratory phase, and thus blunt any significant change after a single AD session. In COPD and asthma, inspiratory Rrs has slightly better between-day reproducibility than does total Rrs [25]. To our knowledge, there are currently no data on the reproducibility of various FOT parameters in CF subjects.

The mechanism underlying the improvement in  $Xrs_5$  is complex and not completely understood. Low frequency reactance reflects the elastic properties of the lung (elastance) and is indicative of opening of small airways and collapsed areas of the lung [26]. The reduction in negative inspiratory  $Xrs_5$  values (i.e., increased reactance) and the observed improvement in FVC are consistent with the hypothesis that AD improves airway permeability, decreases gas trapping, and thus improves distensibility of the small airways [27]. A significant proportion of our subjects exhibited EFL at baseline according to  $\Delta Xrs$ . In COPD subjects,  $\Delta Xrs$  was shown to be a reliable indicator of EFL compared with the reference technique using esophageal pressure [28]. The same concept most likely applies to CF subjects. AD had no impact on this parameter, suggesting either a predominant proximal effect of the technique or a major contribution of small airway structural remodeling to EFL. Measurement of resistance by forced oscillations has also been studied in non-CF subjects with bronchiectasis. Our results are in agreement with those studies, which demonstrated a significant decrease in global resistance ( $Rrs_5$ ) and no change in  $Xrs_5$  after respiratory therapy [29][30]. We can hypothesize that the global resistance is partly related to a contribution of sputum to luminal airway occlusion. Several studies have also emphasized the potential for FOT to enable better understanding of the complex pathophysiology of obstructive lung diseases such as asthma [31] and COPD [10].

The short-term effects of airway clearance on  $FEV_1$  and FVC in our study are discordant with the results of other studies using various maneuvers. Thus, no significant change in  $FEV_1$  and FVC was observed with the ELTGOL technique [12], whereas improvements were seen after supervised chest physiotherapy with a positive expiratory pressure (PEP) mask [32] or an incentive spirometer, but not after AD [33]. In our study, although the  $FEV_1$  and FVC improvements were statistically significant, they may be irrelevant in clinical practice based on a minimal clinically important difference (MCID) of 100 mL for  $FEV_1$  [21]. Only 23% of subjects in our study showed improvement in  $FEV_1$  that exceeded 100 mL. Evaluation of the short-term clinical benefit of AD on patient-reported outcomes was beyond the scope of this study. Although the use of a PEP mask has been shown to significantly improve  $FEV_1$  and FVC in CF subjects [32], albeit below the 100 mL MCID, those subjects received salbutamol prior to airway clearance. Indeed, most studies include a salbutamol dose 20 min before physiotherapy [12][30][32]. We chose not to administer a bronchodilator to avoid potential bias. However, this choice is questionable because, as mentioned, bronchodilators are routinely used before daily physical therapy and some CF subjects do find this effective [16][34].

Although we avoided any potential effects of spirometry on FOT measurements by performing the baseline FOT first, the results of our control group confirm that changes in resistance were not a consequence of the first spirometry. We chose to perform measurements at 30 min after the AD session based on the results of a lung clearance index study showing that the effect of airway clearance in CF subjects was maximal at 30 min compared with 5 min, 1 h, or 2 h [35].

## Conclusion

Our study shows that a single session of AD improved airway inspiratory resistance, except in the distal airways. The FOT opens up new avenues of mechanistic research to understand the



pathophysiological effects of airway clearance physiotherapy in CF. Similar studies with other airway clearance techniques or exercise, and evaluation of longer treatment periods, would improve our understanding of the magnitude and range of parameters affected by the different techniques.

## Supporting information

**S1 Table. Raw data for CF controls and CF patients.**  
(XLSX)

## Acknowledgments

The authors wish to thank Anne M. O'Rourke for editing the manuscript.

## Author Contributions

**Conceptualization:** Elliot Wallaert, Thierry Perez, Benoit Wallaert, Olivier Le Rouzic.

**Formal analysis:** Gregory Reychler.

**Investigation:** Elliot Wallaert.

**Methodology:** Benoit Wallaert, Olivier Le Rouzic.

**Writing – original draft:** Elliot Wallaert, Benoit Wallaert.

**Writing – review & editing:** Elliot Wallaert, Thierry Perez, Anne Prevotat, Gregory Reychler, Benoit Wallaert, Olivier Le Rouzic.

## References

1. Goss CH, Burns JL. Exacerbations in cystic fibrosis. 1: Epidemiology and pathogenesis. *Thorax*. 2007; 62: 360–367. <https://doi.org/10.1136/thx.2006.060889> PMID: 17387214
2. McIlwaine MP, Lee Son NM, Richmond ML. Physiotherapy and cystic fibrosis: what is the evidence base? *Curr Opin Pulm Med*. 2014; 20: 613–617. <https://doi.org/10.1097/MCP.0000000000000110> PMID: 25225791
3. Bradley JM, Moran FM, Stuart Elborn J. Evidence for physical therapies (airway clearance and physical training) in cystic fibrosis: An overview of five Cochrane systematic reviews. *Respir Med*. 2006; 100: 191–201. <https://doi.org/10.1016/j.rmed.2005.11.028> PMID: 16412951
4. Main E, Prasad A, Schans C. Conventional chest physiotherapy compared to other airway clearance techniques for cystic fibrosis. *Cochrane Database Syst Rev*. 2005; CD002011. <https://doi.org/10.1002/14651858.CD002011.pub2> PMID: 15674888
5. Cabillic M, Gouilly P, Reychler G. Techniques manuelles de drainage bronchique des adultes et adolescents: quel niveau de preuve? *Kinésithérapie Rev*. 2014; 14: 43–64. <https://doi.org/10.1016/j.kine.2014.09.009>
6. McIlwaine M, Wong LT, Chilvers M, Davidson GF. Long-term comparative trial of two different physiotherapy techniques; postural drainage with percussion and autogenic drainage, in the treatment of cystic fibrosis. *Pediatr Pulmonol*. 2010; 45: 1064–1069. <https://doi.org/10.1002/ppul.21247> PMID: 20836133
7. McCormack P, Burnham P, Southern KW. Autogenic drainage for airway clearance in cystic fibrosis. *Cochrane Database Syst Rev*. 2017; 10: CD009595. <https://doi.org/10.1002/14651858.CD009595.pub2> PMID: 28984368
8. Reychler G. Quelle kinésithérapie de désencombrement pour demain? *Rev Mal Respir*. 2014; 31: 691–692. <https://doi.org/10.1016/j.rmr.2014.07.008>
9. Dubois AB, Brody AW, Lewis DH, Burgess BF. Oscillation mechanics of lungs and chest in man. *J Appl Physiol*. 1956; 8: 587–594. <https://doi.org/10.1152/jappl.1956.8.6.587> PMID: 13331841
10. Kaczka DW, Dellacá RL. Oscillation mechanics of the respiratory system: applications to lung disease. *Crit Rev Biomed Eng*. 2011; 39: 337–359. PMID: 22011237

11. Lima AN, Faria ACD, Lopes AJ, Jansen JM, Melo PL. Forced oscillations and respiratory system modeling in adults with cystic fibrosis. *Biomed Eng Online*. 2015; 14: 11. <https://doi.org/10.1186/s12938-015-0007-7> PMID: 25889005
12. Guimarães FS, Lopes AJ, Moço VJR, Cavalcanti de Souza F, Silveira de Menezes SL. Eltgol acutely improves airway clearance and reduces static pulmonary volumes in adult cystic fibrosis patients. *J Phys Ther Sci*. 2014; 26: 813–816. <https://doi.org/10.1589/jpts.26.813> PMID: 25013273
13. Smyth AR, Bell SC, Bojcin S, Bryon M, Duff A, Flume P, et al. European Cystic Fibrosis Society Standards of Care: Best Practice guidelines. *J Cyst Fibros Off J Eur Cyst Fibros Soc*. 2014; 13 Suppl 1: S23–42. <https://doi.org/10.1016/j.jcf.2014.03.010> PMID: 24856775
14. Dab I, Alexander F. The mechanism of autogenic drainage studied with flow volume curves. *Monogr Paediatr*. 1979; 10: 50–53. PMID: 460279
15. Chevallier J. *Autogenic drainage. Cystic fibrosis: horizons*. John Wiley & sons. New York: Lawson D; 1984. p. 235.
16. Pryor JA. Physiotherapy for airway clearance in adults. *Eur Respir J*. 1999; 14: 1418–1424. PMID: 10624775
17. Oostveen E, MacLeod D, Lorino H, Farré R, Hantos Z, Desager K, et al. The forced oscillation technique in clinical practice: methodology, recommendations and future developments. *Eur Respir J*. 2003; 22: 1026–1041. <https://doi.org/10.1183/09031936.03.00089403> PMID: 14680096
18. Aarli BB, Calverley PMA, Jensen RL, Eagan TML, Bakke PS, Hardie JA. Variability of within-breath reactance in COPD patients and its association with dyspnoea. *Eur Respir J*. 2015; 45: 625–634. <https://doi.org/10.1183/09031936.00051214> PMID: 25359342
19. Oostveen E, Boda K, van der Grinten CPM, James AL, Young S, Nieland H, et al. Respiratory impedance in healthy subjects: baseline values and bronchodilator response. *Eur Respir J*. 2013; 42: 1513–1523. <https://doi.org/10.1183/09031936.00126212> PMID: 23598954
20. Quanjer PH, Stanojevic S, Cole TJ, Baur X, Hall GL, Culver BH, et al. Multi-ethnic reference values for spirometry for the 3–95-yr age range: the global lung function 2012 equations. *Eur Respir J*. 2012; 40: 1324–1343. <https://doi.org/10.1183/09031936.00080312> PMID: 22743675
21. Jones PW, Beeh KM, Chapman KR, Decramer M, Mahler DA, Wedzicha JA. Minimal clinically important differences in pharmacological trials. *Am J Respir Crit Care Med*. 2014; 189: 250–255. <https://doi.org/10.1164/rccm.201310-1863PP> PMID: 24383418
22. Brashier B, Salvi S. Measuring lung function using sound waves: role of the forced oscillation technique and impulse oscillometry system. *Breathe*. 2015; 11: 57–65. <https://doi.org/10.1183/20734735.020514> PMID: 26306104
23. Baier H, Wanner A, Zarzecki S, Sackner MA. Relationships among glottis opening, respiratory flow, and upper airway resistance in humans. *J Appl Physiol*. 1977; 43: 603–611. <https://doi.org/10.1152/jappl.1977.43.4.603> PMID: 908674
24. Higenbottam T, Payne J. Glottis narrowing in lung disease. *Am Rev Respir Dis*. 1982; 125: 746–750 PMID: 7091882
25. Timmins SC, Coatsworth N, Palnitkar G, Thamrin C, Farrow CE, Schoeffel RE, et al. Day-to-day variability of oscillatory impedance and spirometry in asthma and COPD. *Respir Physiol Neurobiol*. 2013; 185: 416–424. <https://doi.org/10.1016/j.resp.2012.08.017> PMID: 22960661
26. Komarow HD, Myles IA, Uzzaman A, Metcalfe DD. Impulse oscillometry in the evaluation of diseases of the airways in children. *Ann Allergy Asthma Immunol Off Publ Am Coll Allergy Asthma Immunol*. 2011; 106: 191–199. <https://doi.org/10.1016/j.anai.2010.11.011> PMID: 21354020
27. Downie SR, Salome CM, Verbanck S, Thompson BR, Berend N, King GG. Effect of methacholine on peripheral lung mechanics and ventilation heterogeneity in asthma. *J Appl Physiol Bethesda Md* 1985. 2013; 114: 770–777. <https://doi.org/10.1152/japplphysiol.01198.2012> PMID: 23372144
28. Dellacà RL, Santus P, Aliverti A, Stevenson N, Centanni S, Macklem PT, et al. Detection of expiratory flow limitation in COPD using the forced oscillation technique. *Eur Respir J*. 2004; 23: 232–240. PMID: 14979497
29. Guimarães FS, Moço VJR, Menezes SLS, Dias CM, Salles REB, Lopes AJ. Effects of ELTGOL and Flutter VRP1® on the dynamic and static pulmonary volumes and on the secretion clearance of patients with bronchiectasis. *Rev Bras Fisioter São Carlos São Paulo Braz*. 2012; 16: 108–113.
30. Figueiredo PHS, Zin WA, Guimarães FS. Flutter valve improves respiratory mechanics and sputum production in patients with bronchiectasis. *Physiother Res Int*. 2012; 17: 12–20. <https://doi.org/10.1002/pri.507> PMID: 21182171
31. Saadeh C, Cross B, Saadeh C, Gaylor M. Retrospective observations on the ability to diagnose and manage patients with asthma through the use of impulse oscillometry: comparison with spirometry and

- overview of the literature. *Pulm Med*. 2014; 2014: 376890. <https://doi.org/10.1155/2014/376890> PMID: [24665365](https://pubmed.ncbi.nlm.nih.gov/24665365/)
32. Pflieger A, Steinbacher M, Schwantzer G, Weinhandl E, Wagner M, Eber E. Short-term effects of physiotherapy on ventilation inhomogeneity in cystic fibrosis patients with a wide range of lung disease severity. *J Cyst Fibros*. 2015; 14: 627–631. <https://doi.org/10.1016/j.jcf.2014.12.017> PMID: [25612899](https://pubmed.ncbi.nlm.nih.gov/25612899/)
  33. Sokol G, Vilozni D, Hakimi R, Lavie M, Sarouk I, Bat-El Bar, et al. The Short-Term Effect of Breathing Tasks Via an Incentive Spirometer on Lung Function Compared With Autogenic Drainage in Subjects With Cystic Fibrosis. *Respir Care*. 2015; 60: 1819–1825. <https://doi.org/10.4187/respcare.04008> PMID: [26374905](https://pubmed.ncbi.nlm.nih.gov/26374905/)
  34. Mortensen J, Hansen A, Falk M, Nielsen IK, Groth S. Reduced effect of inhaled beta 2-adrenergic agonists on lung mucociliary clearance in patients with cystic fibrosis. *Chest*. 1993; 103: 805–811. PMID: [8095449](https://pubmed.ncbi.nlm.nih.gov/8095449/)
  35. Rodriguez Hortal MC, Hjelte L. Time point to perform lung function tests evaluating the effects of an airway clearance therapy session in cystic fibrosis. *Respir Care*. 2014; 59: 1537–1541. <https://doi.org/10.4187/respcare.02823> PMID: [24847094](https://pubmed.ncbi.nlm.nih.gov/24847094/)
